# Supplementary material for: High-resolution air quality maps for Bucharest using a mixed-effects modeling framework
Source: Copernicus journal article supplement (doi:10.5194/acp-25-4639-2025), 2025-05-05
Supplement: Supplementary file 1 [file acp-25-4639-2025-supplement.pdf]

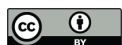

*Supplement of*

## **High-resolution air quality maps for Bucharest using a mixed-effects modeling framework**

**Camelia Talianu et al.**

*Correspondence to:* Camelia Talianu (camelia@inoe.ro), Jeni Vasilescu (jeni@inoe.ro), and Doina Nicolae (nnicol@inoe.ro)

The copyright of individual parts of the supplement might differ from the article licence.

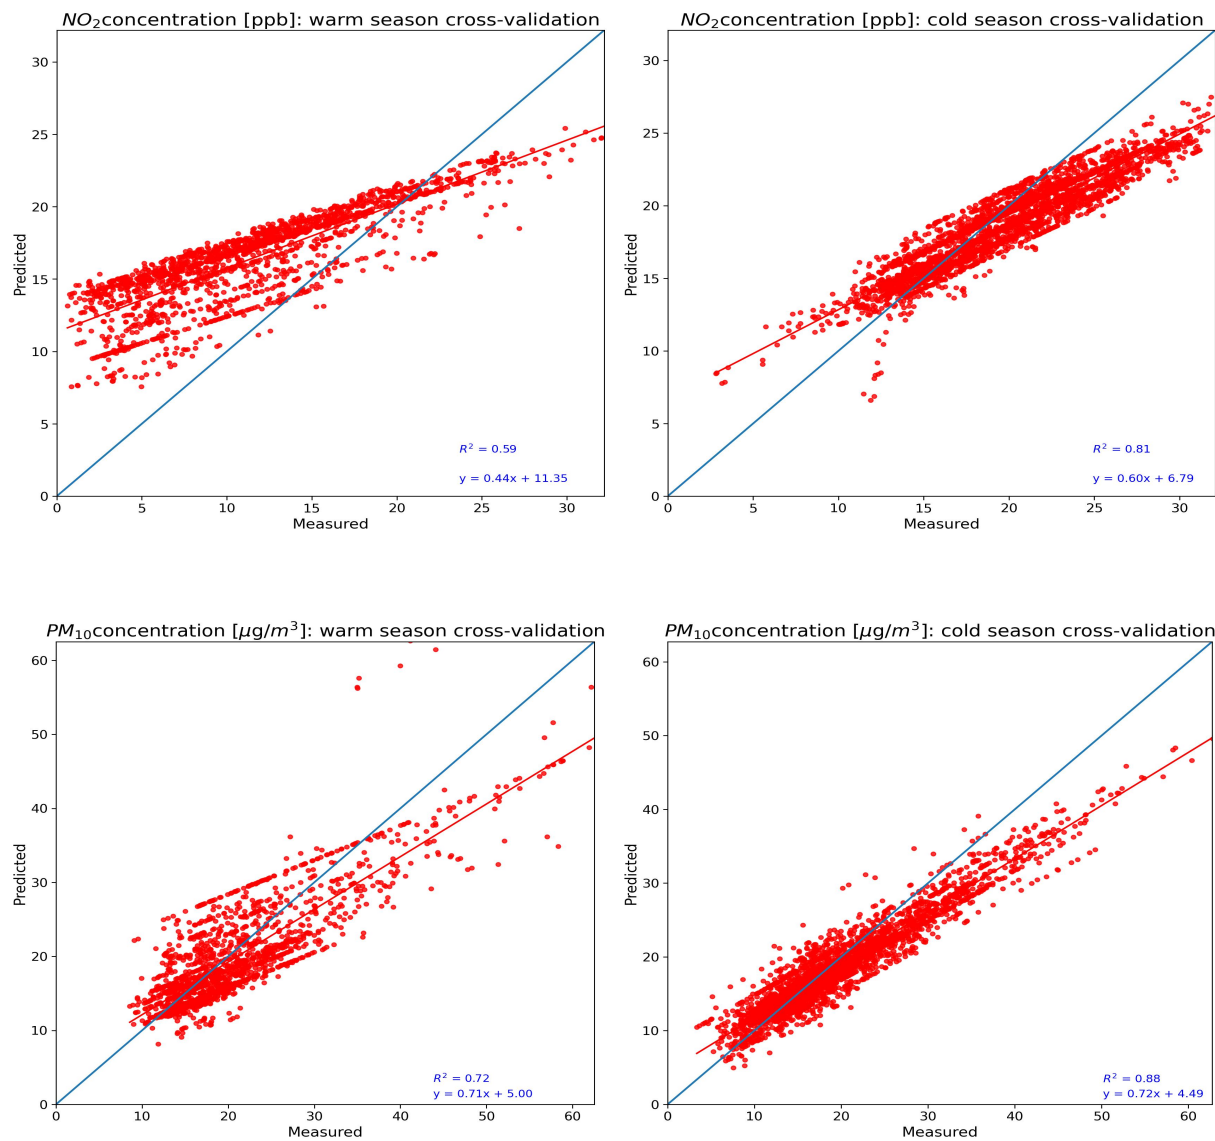

**Figure 1.** Cross-validation scatter plots of  $\text{NO}_2$  (upper panel) and  $\text{PM}_{10}$  (lower panel) during warm (left panel) and cold (right panel) season
